# Supplementary material for: Predicting Extrathyroidal Extension in Patients With Papillary Thyroid Microcarcinoma According to a BRAF Mutation
Source: PubMed Central journal article supplement — Clin Exp Otorhinolaryngol. 2016 Jul 2;10(2):174–80. doi: 10.21053/ceo.2015.01655 (PMC5426396; doi:10.21053/ceo.2015.01655), 2016-07-02
Supplement: ceo-2015-01655-s001.pdf [file ceo-2015-01655-s001.pdf]

## Clinical and Experimental Otorhinolaryngology

Supplementary Table 1. Univariate analysis for evaluating the correlation between overall extrathyroidal extension and preoperative parameters

| Parameter          | BRAF (-)               |         | BRAF (+)              |         |
|--------------------|------------------------|---------|-----------------------|---------|
|                    | OR (95% CI)            | P-value | OR (95% CI)           | P-value |
| Age                | 0.983 (0.952–1.015)    | 0.298   | 0.985 (0.960–0.011)   | 0.264   |
| Female sex         | 0.800 (0.237–2.702)    | 0.719   | 0.288 (0.142–0.587)   | 0.001   |
| Size               | 15.143 (1.798–127.547) | 0.012   | 13.188 (2.615–66.502) | 0.002   |
| cN1a               | 0.868 (0.274–2.756)    | 0.811   | 1.116 (0.271–4.600)   | 0.879   |
| cN1b               | 0.674 (0.068–6.664)    | 0.736   | 4.889 (1.041–22.950)  | 0.044   |
| US group           | 1.505 (0.095–2.070)    | 0.012   | 1.384 (1.052–1.822)   | 0.020   |
| Marked hypoechoic  | 0.555 (0.206–1.494)    | 0.244   | 0.492 (0.234–1.032)   | 0.060   |
| Taller than wide   | 0.796 (0.388–1.632)    | 0.533   | 0.846 (0.440–1.627)   | 0.617   |
| Spiculated margin  | 1.515 (0.724–3.173)    | 0.270   | 0.941 (0.493–1.794)   | 0.853   |
| Microcalcification | 1.240 (0.612–2.512)    | 0.551   | 1.164 (0.660–2.056)   | 0.599   |

Overall extrathyroidal extension included microscopic and gross extrathyroidal extension.

OR, odds ratio; CI, confidence interval; US, ultrasonography.
